# Supplementary material for: Core–shell-structured and hydrogen-evolution-suppressing zinc anode for high stability Zn–Ni secondary batteries
Source: Royal Society of Chemistry journal article supplement (doi:10.1039/d1se02039k), 2022-01-01
Supplement: d1se02039k1.pdf [file d1se02039k1.pdf]

## **Supporting Information**

### **Core-shell structure and hydrogen-evolution-suppressing zinc anode for high stability Zn-Ni secondary battery**

Chun Guo, Zheng Li, Tao Wang, Hao Cheng, Yuan Zhu, Zhongliang Tian \*

*School of Metallurgy and Environment, Central South University, Changsha, 410083, China*

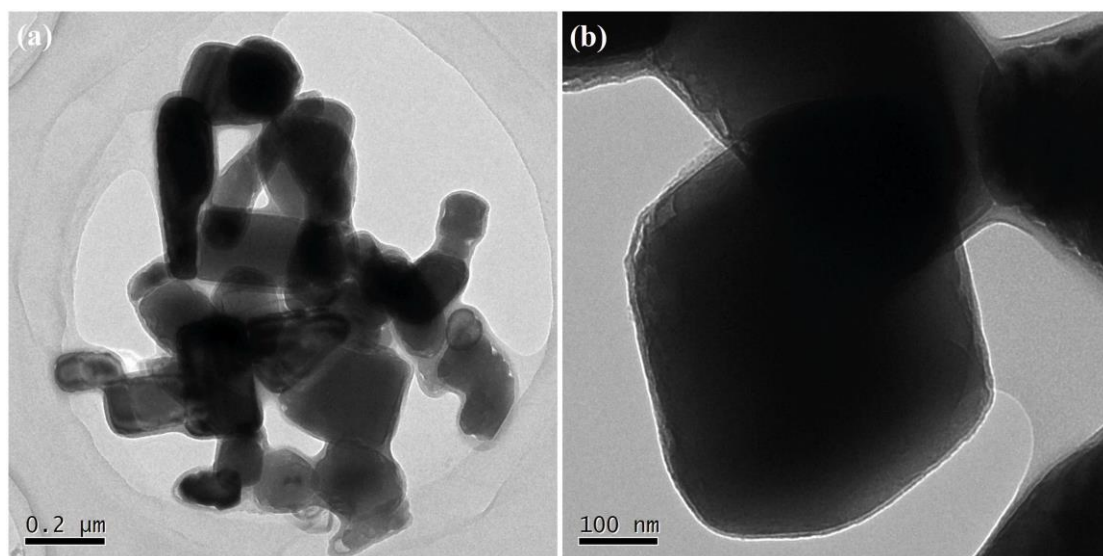

**Figure. S1** TEM images of precursor

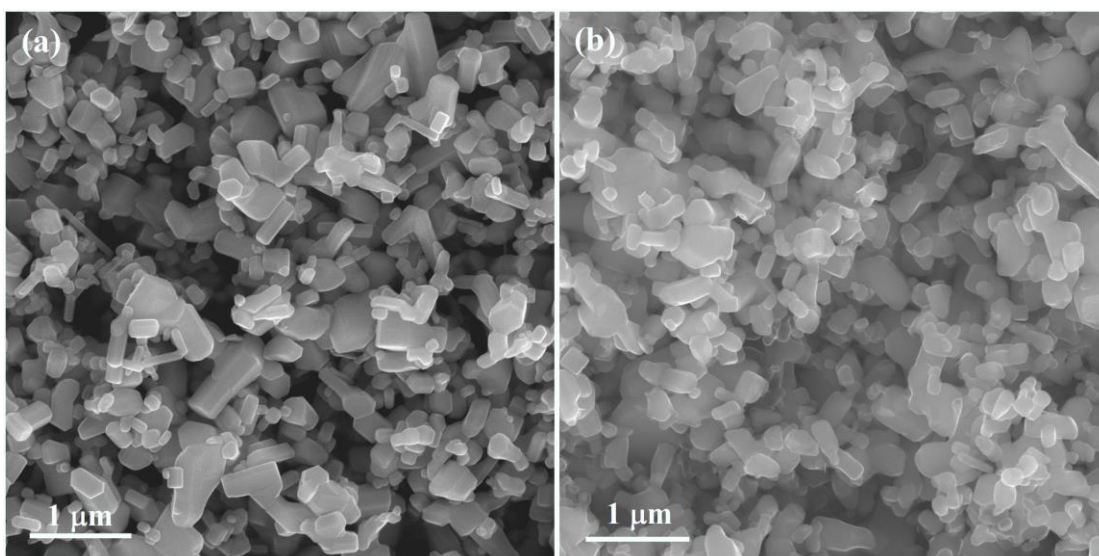

**Figure. S2** (a)SEM image of pure ZnO, (b) SEM image of ZnO@C

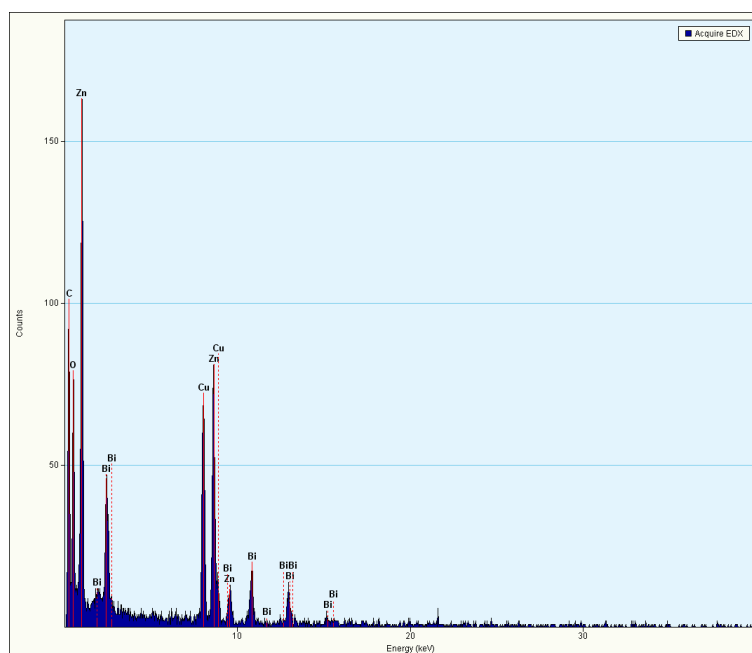

**Figure. S3** EDX spectrum diagram of selected area in **Figure. 1f**

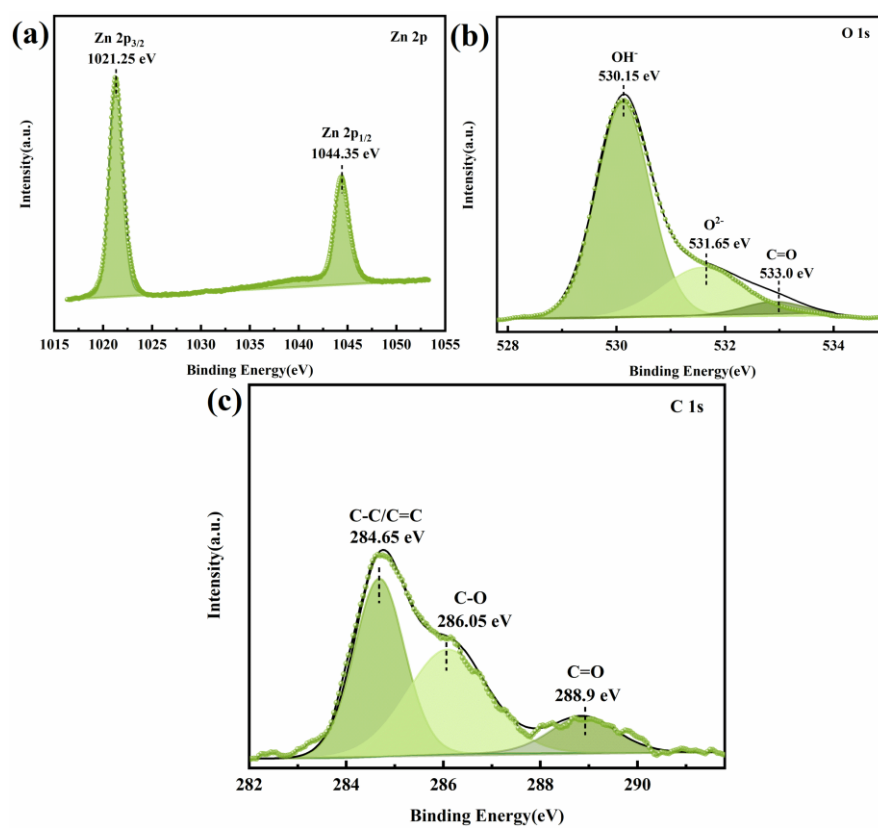

**Figure. S4** High-resolution XPS spectrum of pure ZnO

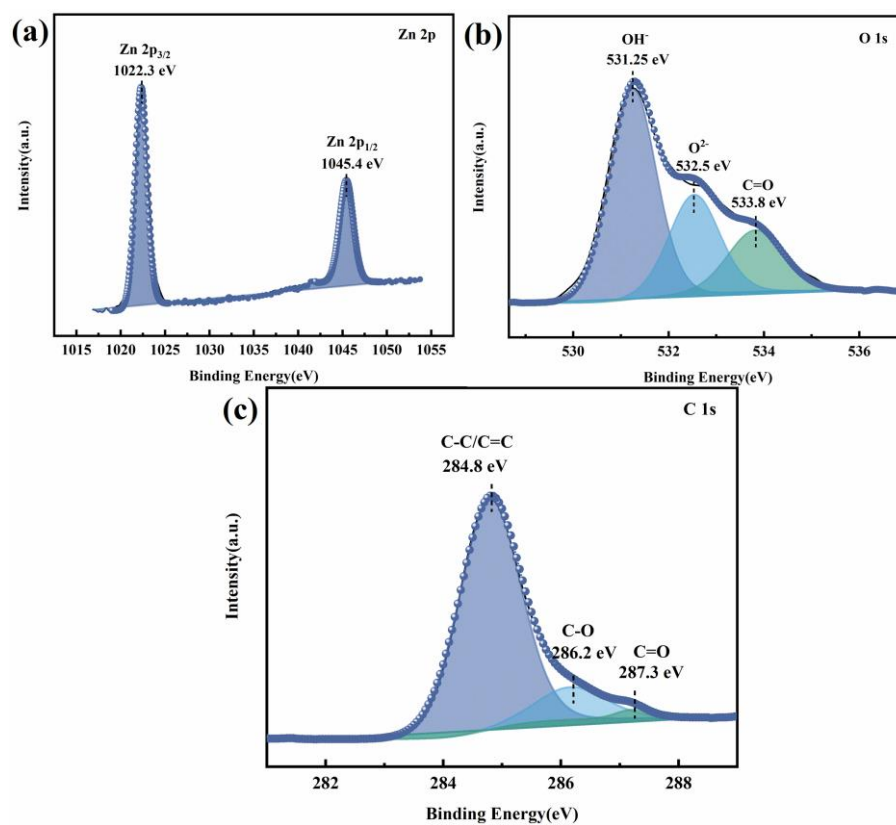

**Figure. S5** High-resolution XPS spectrum of pure ZnO@C

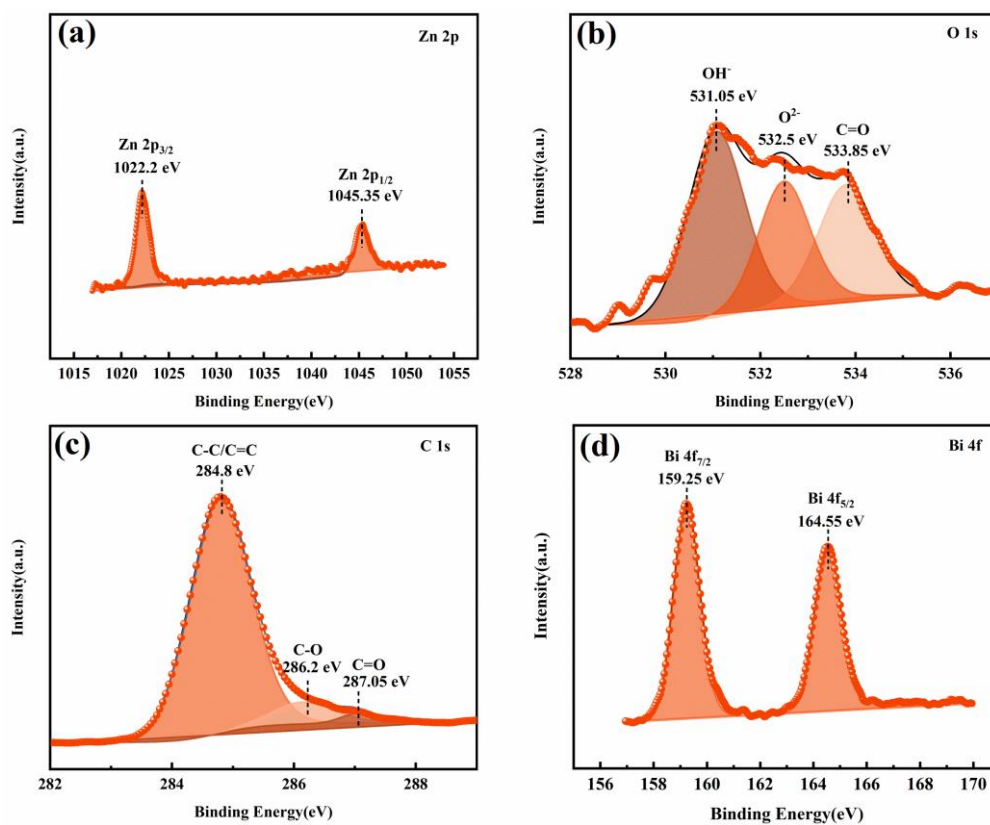

**Figure. S6** High-resolution XPS spectrum of pure ZnO@C/Bi

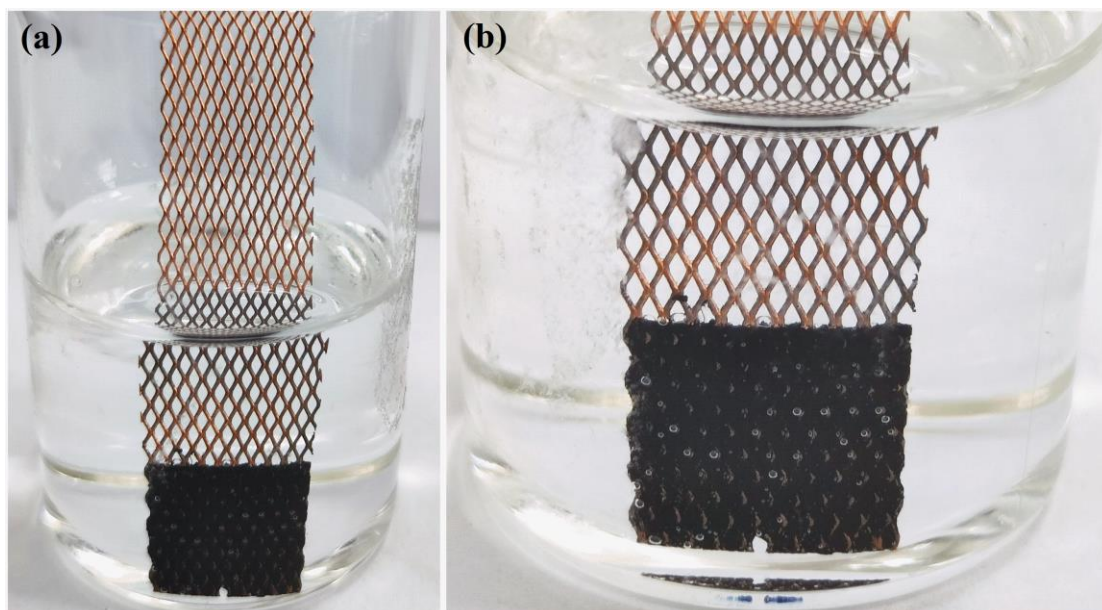

**Figure. S7** Images of electrode of pure ZnO@C soaked in 6M KOH electrolyte

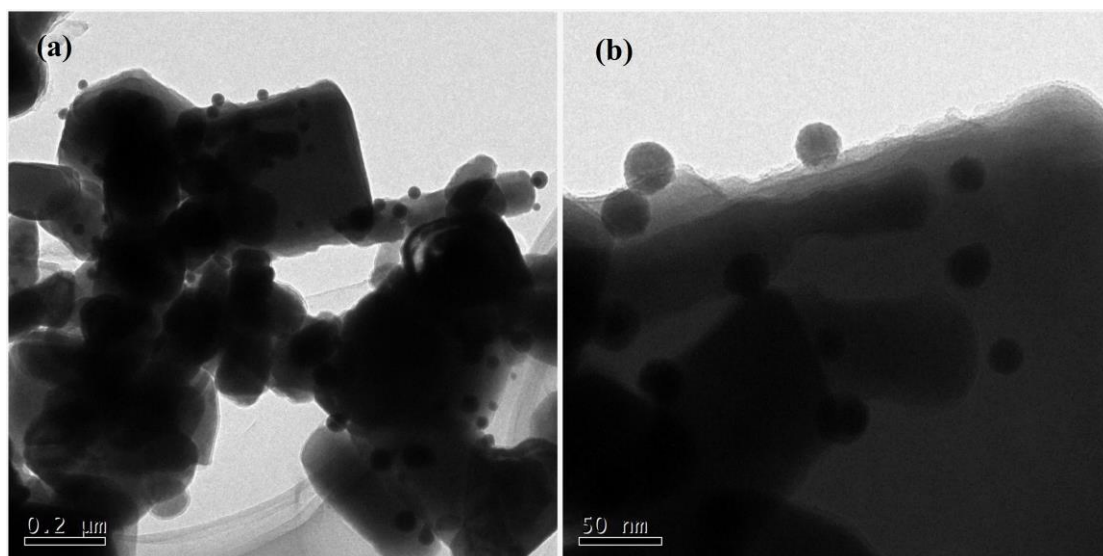

**Figure. S8** TEM images of the materials obtained by one-step hydrothermal and calcination process

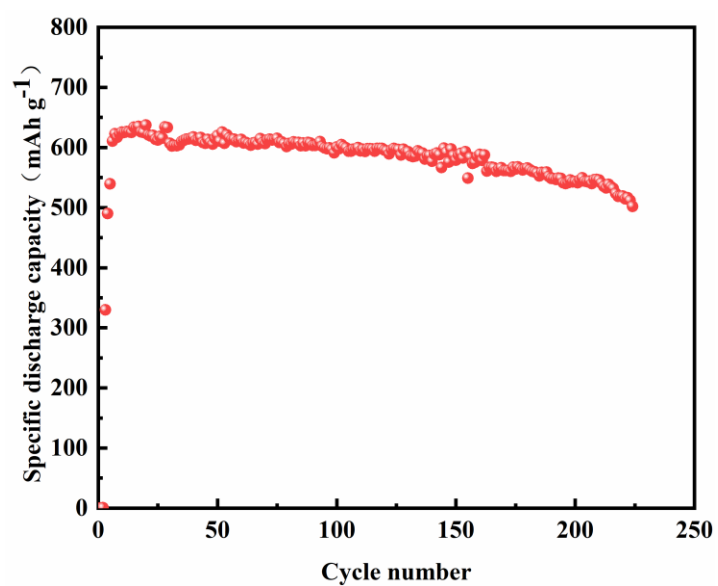

**Figure. S9** Cycle performance of the materials obtained by one-step hydrothermal and calcination process

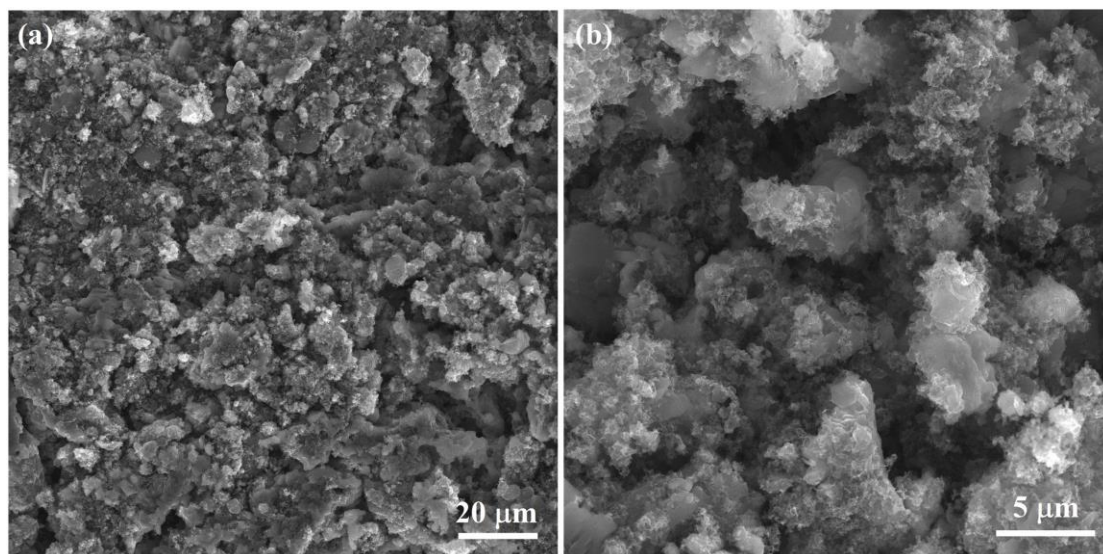

**Figure. S10** SEM images of ZnO@C after 110 cycles.

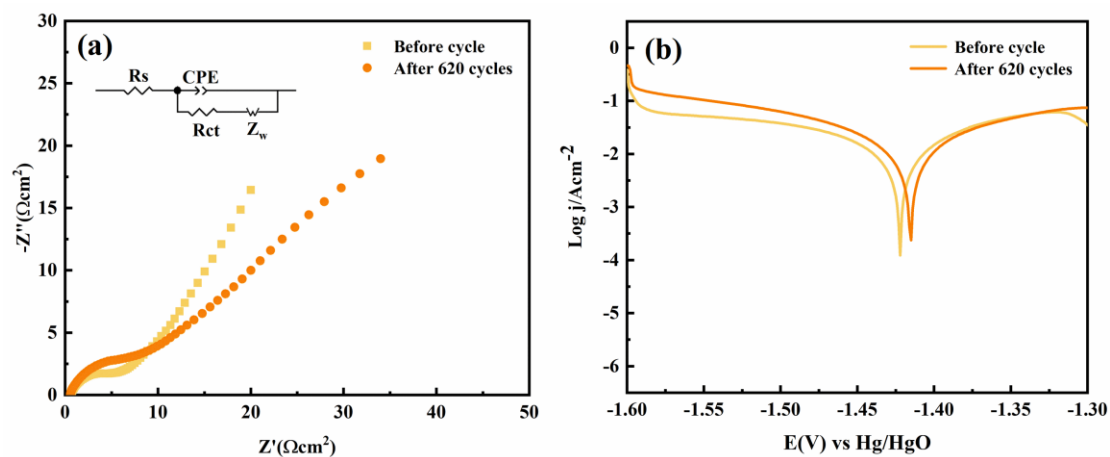

**Figure. S11** (a) The typical Nyquist plots and equivalent circuit of ZnO@C/Bi before cycle and after 620 cycles; (b) Tafel plots of ZnO@C/Bi before cycle and after 620 cycles.

| Samples  | BET Surface Area/m <sup>2</sup> ·g <sup>-1</sup> | Median pore width/nm |
|----------|--------------------------------------------------|----------------------|
| Pure ZnO | 1.5510                                           | 0.9192               |
| ZnO@C    | 40.0280                                          | 0.7826               |
| ZnO@C/Bi | 50.1724                                          | 0.7615               |

**Table. S1** Table of BET Surface Area and Median pore width for pure ZnO, ZnO@C and ZnO@C/Bi

| Samples  | Cathode<br>peak<br>position/V | Cathode<br>peak<br>height/A·g <sup>-1</sup> | Anode<br>peak<br>position/V | Anodic<br>peak<br>height/A·g <sup>-1</sup> | Peak<br>potential<br>difference/V |
|----------|-------------------------------|---------------------------------------------|-----------------------------|--------------------------------------------|-----------------------------------|
| Pure ZnO | -1.576                        | -0.1407                                     | -1.232                      | 0.1736                                     | 0.344                             |
| ZnO@C    | -1.555                        | -0.09003                                    | -1.233                      | 0.1622                                     | 0.322                             |
| ZnO@C/Bi | -1.579                        | -0.1334                                     | -1.273                      | 0.1734                                     | 0.306                             |

**Table. S2** Table of Cyclic voltammetry curve parameters of pure ZnO, ZnO@C and ZnO@C/Bi.

| Samples  | $R_s/\Omega\text{ cm}^2$ | $R_{ct}/\Omega\text{ cm}^2$ |
|----------|--------------------------|-----------------------------|
| Pure ZnO | 0.5935                   | 8.89                        |
| ZnO@C    | 0.7258                   | 4.18                        |
| ZnO@C/Bi | 0.6787                   | 3.45                        |

**Table. S3** Table of EIS parameters of pure ZnO, ZnO@C and ZnO@C/Bi.

| Samples  | Corrosion potential<br>( $E_{\text{corr}}$ ) /V | Corrosion current density<br>( $I_{\text{corr}}$ ) /mA·cm <sup>-2</sup> | Inhibition<br>efficiency/% |
|----------|-------------------------------------------------|-------------------------------------------------------------------------|----------------------------|
| Pure ZnO | -1.4405                                         | 26.55                                                                   | /                          |
| ZnO@C    | -1.4326                                         | 20.89                                                                   | 21.31                      |
| ZnO@C/Bi | -1.4227                                         | 18.57                                                                   | 30.10                      |

**Table. S4** Table of corrosion potential and corrosion current density of pure ZnO,

ZnO@C and ZnO@C/Bi.

|                                     | Rate                            | Electrolyte                                                                              | Separator                           | Activation cycles                        |
|-------------------------------------|---------------------------------|------------------------------------------------------------------------------------------|-------------------------------------|------------------------------------------|
| ZnO-N <sub>2</sub> @C               | 1 C (500 mA g <sup>-1</sup> )   | 4 M KOH, 1.6 M K <sub>2</sub> BO <sub>3</sub> , 0.9 M KF, 0.1 M LiOH, saturated with ZnO | Polyolefin microporous membrane     | 5                                        |
| ZnO@RFC                             | 1 C (600 mA h g <sup>-1</sup> ) | 6 M KOH saturated with 0.5 M ZnO                                                         | Polypropylene microporous membrane  | 10 (Charge at 0.2 C, discharge at 0.5 C) |
| Zn-Pb                               | 1 C (600 mA h g <sup>-1</sup> ) | 6 M KOH, 5 wt% ZnO                                                                       | Glass fiber membrane                | 5                                        |
| Ag/ ZnO                             | 1 C (659 mA h g <sup>-1</sup> ) | 6 M KOH saturated with 0.5 M ZnO                                                         | Polypropylene microporous membrane  | 5 (Charge at 0.2 C, discharge at 0.5 C)  |
| SnO <sub>2</sub> / ZnO              | 1 C (659 mA h g <sup>-1</sup> ) | 6 M KOH saturated with 0.5 M ZnO                                                         | Polypropylene microporous membrane  | 5 (Charge at 0.2 C, discharge at 0.5 C)  |
| Bi <sub>2</sub> O <sub>3</sub> @ZnO | 1 C (659 mA h g <sup>-1</sup> ) | 6 M KOH saturated with ZnO                                                               | Polypropylene microporous membrane  | 5 (Charge at 0.2 C, discharge at 0.2 C)  |
| ZnO@C/Bi                            | 1 C (659 mA h g <sup>-1</sup> ) | 6 M KOH saturated with ZnO                                                               | Polypropylene microporous membrane  | 5 (Charge at 0.2 C, discharge at 0.2 C)  |
| ZnO@C                               | 1 C (658 mA h g <sup>-1</sup> ) | 6 M KOH saturated with ZnO                                                               | polypropylene microporous membranes | 5 (Charge at 0.1 C, discharge at 0.2 C)  |
| This work                           | 1 C (659 mA h g <sup>-1</sup> ) | 6 M KOH saturated with 0.5 M ZnO                                                         | polypropylene microporous membranes | 5 (Charge at 0.2 C, discharge at 0.5 C)  |

**Table. S5** The test conditions for the comparison of the battery performance in figure 5(b).

| Samples                                          | Pure ZnO | ZnO@C  | ZnO@C/Bi |
|--------------------------------------------------|----------|--------|----------|
| Median voltage of charge /V                      | 1.8666   | 1.8624 | 1.8376   |
| Median voltage of discharge /V                   | 1.7208   | 1.7346 | 1.7138   |
| Median voltage difference /V                     | 0.1458   | 0.1278 | 0.1238   |
| Specific discharge capacity/ mAh·g <sup>-1</sup> | 526.7    | 514.1  | 576.3    |

**Table. S6** Charge and discharge data of pure ZnO, ZnO@C and ZnO@C/Bi at 50th.

| ZnO@C/Bi | Median voltage<br>of charge /V | Median voltage<br>of discharge /V | Median voltage<br>difference /V | Specific discharge<br>capacity/ mAh·g <sup>-1</sup> |
|----------|--------------------------------|-----------------------------------|---------------------------------|-----------------------------------------------------|
| 50 th    | 1.8376                         | 1.7138                            | 0.1238                          | 576.3                                               |
| 100 th   | 1.8232                         | 1.7083                            | 0.1149                          | 601.6                                               |
| 200 th   | 1.8451                         | 1.7326                            | 0.1125                          | 567.9                                               |
| 300 th   | 1.8480                         | 1.7302                            | 0.1178                          | 560.2                                               |
| 400 th   | 1.8528                         | 1.7326                            | 0.1202                          | 543.6                                               |
| 500 th   | 1.8232                         | 1.713                             | 0.1102                          | 576.4                                               |
| 600 th   | 1.8561                         | 1.7239                            | 0.1322                          | 531.1                                               |

**Table. S7** Charge and discharge data at 50 th, 100 th, 200 th, 300 th, 400 th, 500 th and 600 th for ZnO@C/Bi
